# Supplementary material
Source: Springer Nature journal article supplement (https://www.springermedizin.de/resource/supplementary/13019_2012_778_MOESM7_ESM.pdf/9639066)

**Figure 5a**

**Sheep 2087:**

**Post procedure**

**Control**

**With external support**

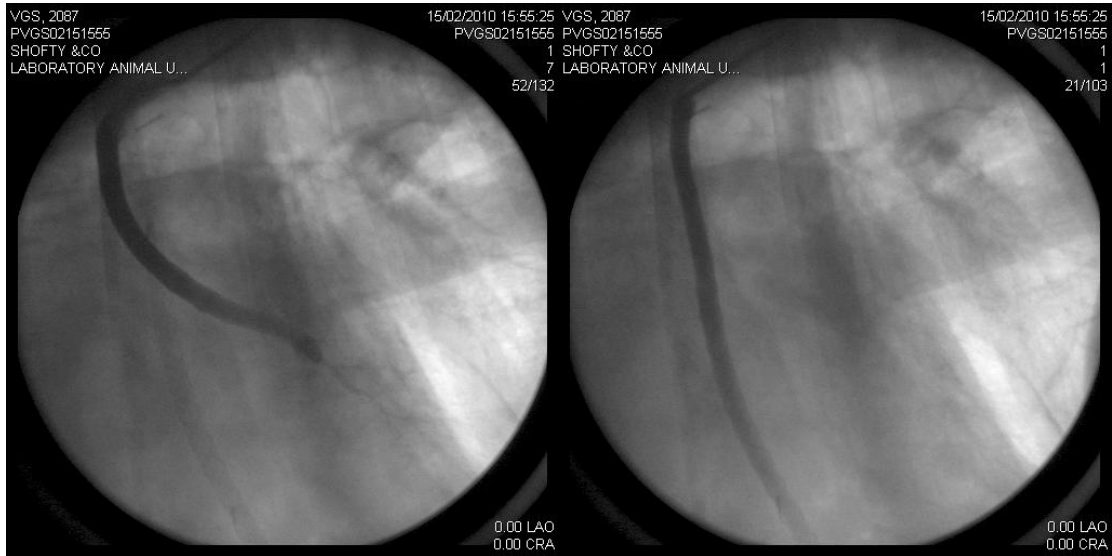

**At 12 weeks**

**Control**

**With external support**

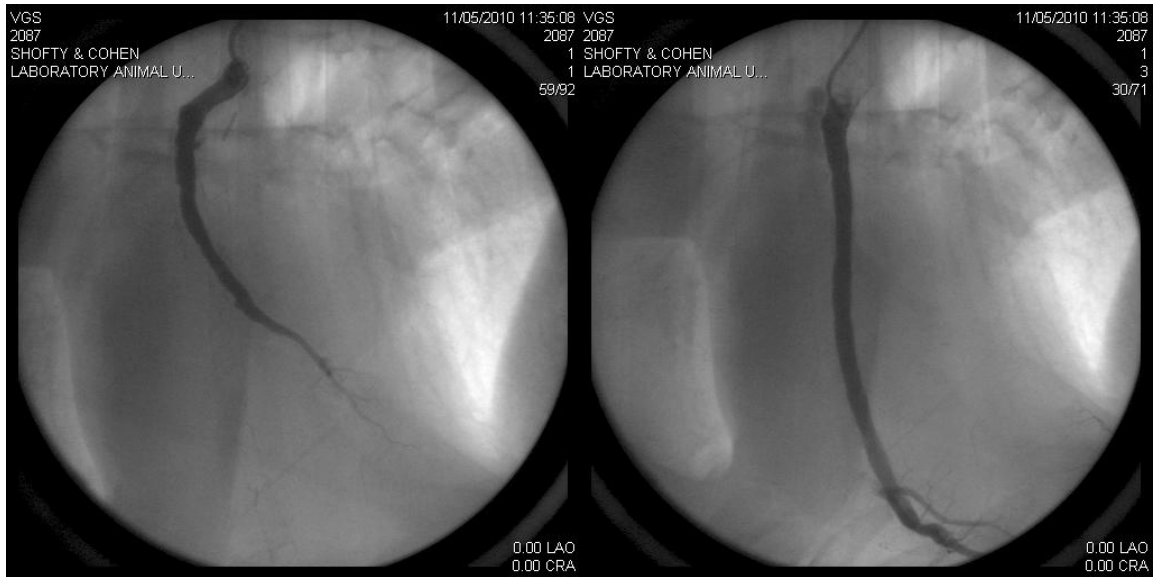

Supplement: MOESM7 [file 9639066]
